# Supplementary material for: Paleogeographic controls on the evolution of Late Cretaceous oceancirculation
Source: Copernicus journal article supplement (doi:10.5194/cp-2019-157), 2020-01-16
Supplement: Supplementary file 1 [file cp-2019-157-supplement.pdf]

Supplementary Materials to

Paleogeographic controls on the evolution of Late Cretaceous ocean circulation

Jean-Baptiste Ladant, Christopher J. Poulsen, Frédéric Fluteau, Clay R. Tabor, Kenneth G. MacLeod, Ellen E. Martin, Shannon J. Haynes, Masoud A. Rostami

Table S1-S3.

Supplementary Figures S1-S19.

|                                                     | Cenomanian           |                     |                     |                      | Maastrichtian        |                     |                     |                       |
|-----------------------------------------------------|----------------------|---------------------|---------------------|----------------------|----------------------|---------------------|---------------------|-----------------------|
| Total runoff supply (mSv)                           | Pacific              | Atlantic            | Indian              | Indo-Atlantic        | Pacific              | Atlantic            | Indian              | Indo-Atlantic         |
| Total basin area (10 <sup>6</sup> km <sup>2</sup> ) |                      |                     |                     |                      |                      |                     |                     |                       |
| Global                                              | <u>833</u><br>221.84 | <u>560</u><br>41.71 | <u>647</u><br>71.39 | <u>1207</u><br>113.1 | <u>792</u><br>212.27 | <u>853</u><br>58.08 | <u>648</u><br>69.01 | <u>1501</u><br>127.09 |
| Southern Hemisphere high-latitudes                  | <u>130</u><br>19.95  | <u>54</u><br>5.59   | <u>195</u><br>8.03  | <u>249</u><br>13.62  | <u>129</u><br>17.61  | <u>55</u><br>9.27   | <u>211</u><br>11.11 | <u>266</u><br>20.38   |
| Northern Hemisphere high-latitudes                  | <u>130</u><br>15.49  | <u>83</u><br>2.61   | <u>0</u><br>0       | <u>83</u><br>2.61    | <u>169</u><br>15.04  | <u>151</u><br>3.17  | <u>0</u><br>0       | <u>151</u><br>3.17    |
| Mid- and low-latitudes                              | <u>573</u><br>186.4  | <u>423</u><br>33.5  | <u>452</u><br>63.36 | <u>875</u><br>96.86  | <u>494</u><br>179.62 | <u>647</u><br>45.64 | <u>436</u><br>57.9  | <u>1083</u><br>103.54 |

**Table S1.** Total runoff freshwater supply (mSv) for the Cenomanian and Maastrichtian simulations. The Pacific, Atlantic and Indian basins are defined as shown on Fig. S3. Southern and northern high-latitudes are defined as latitudes < 50°S and > 50°N respectively.

| Site | Location                   | Paleolatitude | Paleolongitude | Paleodepth (m) | Average $\epsilon_{Nd}$ | References            |
|------|----------------------------|---------------|----------------|----------------|-------------------------|-----------------------|
| 765  | Argo Abyssal Plain         | 40°S          | 105°E          | 5000           | -7.9                    | MT12, GL92            |
| 763  | Central Exmouth Plateau    | 44°S          | 100°E          | 500            | -9.8                    | LH12, MT12, V13, GL92 |
| 766  | Gascoyne Abyssal Plain     | 45°S          | 95°E           | 3000           | -6.8                    | R10, MT12, GL92       |
| 258  | Naturaliste Plateau        | 57°S          | 85°E           | 2500 – 3000    | -8.0                    | M16                   |
| 1135 | Southern Kerguelen Plateau | 55°S          | 72°E           | 1300 – 2000    | -7.9                    | LH12                  |
| 1138 | Kerguelen Plateau          | 52°S          | 70°E           | 500 – 1500     | -5.6                    | MT12                  |
| 551  | Goban Spur                 | 40°N          | 2°W            | 1500           | -7.1                    | M12, M85              |
| 530  | SE Angola Basin            | 30°S          | 4°W            | > 2000         | -7.5                    | R10                   |
| 530  | SE Angola Basin            | 31°S          | 5°W            | 3000           | -7.7                    | MT13                  |
| 361  | Cape Basin                 | 45°S          | 5°W            | 4000           | -6.1                    | MT13                  |
| 367  | Cape Verde                 | 17°N          | 18°W           | > 2000         | -9.0                    | M12                   |
| 700  | East Georgia Basin         | 52°S          | 18°W           | 1500 – 2000    | -7.7                    | M16                   |
| 1276 | Newfoundland Margin        | 35°N          | 22°W           | > 2000         | -6.8                    | RV12                  |
| 511  | Falkland Plateau           | 54°S          | 25°W           | > 1000         | -5.2                    | R10                   |
| 511  | Falkland Basin             | 52°S          | 26°W           | 1800           | -5.1                    | MT13                  |
| 1261 | Demerara Rise              | 6°N           | 29°W           | 1000 – 1500    | -13.0                   | M12                   |
| 1260 | Demerara Rise              | 8°N           | 31°W           | 1000 – 1500    | -13.5                   | ML08, ML11, M12, JB10 |
| 1258 | Demerara Rise              | 9°N           | 32°W           | 1000 – 1500    | -13.5                   | ML08, ML11, M12, JB10 |
| 386  | Bermuda Rise               | 27°N          | 35°W           | > 2000         | -6.8                    | M12, RV12             |
| 1050 | Blake Nose                 | 26°N          | 42°W           | 1000 – 2000    | -5.2                    | M12                   |
| 1208 | Shatsky Rise               | 15°N          | 154°W          | 1500 – 2000    | -3.4                    | MT12                  |

**Table S2.** Cenomanian  $\epsilon_{Nd}$  compilation based on Moiroud et al. (2016). The  $\epsilon_{Nd}$  values are averaged between 100 Ma and 90 Ma (see main text). GL92: Gradstein and Ludden (1992), JB10: Jiménez Berrocoso et al. (2010), LH12: Le Houedec et al. (2012), M12: Martin et al. (2012), M16: Moiroud et al. (2016), M85: Masson et al. (1985), ML08: MacLeod et al. (2008), ML11: MacLeod et al. (2011), MT12: Murphy and Thomas (2012), MT13: Murphy and Thomas (2013), R10: Robinson et al. (2010), RV12: Robinson and Vance (2012), V13: Voigt et al. (2013).

| Site | Location                   | Paleolatitude | Paleolongitude | Paleodepth (m) | Average $\epsilon_{Nd}$ | References      |
|------|----------------------------|---------------|----------------|----------------|-------------------------|-----------------|
| 765  | Argo Abyssal Plain         | 40°S          | 105°E          | 5000           | -10.2                   | MT12, GL92      |
| 762  | Central Exmouth Plateau    | 44°S          | 100°E          | 750            | -11.0                   | LH12, V13, GL92 |
| 766  | Gascoyne Abyssal Plain     | 46°S          | 98°E           | 3000           | -9.4                    | R10, MT12, GL92 |
| 1135 | Southern Kerguelen Plateau | 58°S          | 72°E           | 1300 – 2000    | -9.6                    | LH12            |
| 1138 | Kerguelen Plateau          | 55°S          | 70°E           | 500 – 1500     | -8.5                    | MT12            |
| 758  | Ninetyeast Ridge           | 47°S          | 50°E           | 1500 – 2000    | -10.3                   | LH12            |
| 530  | SE Angola Basin            | 30°S          | 1°W            | > 2000         | -10.0                   | R10             |
| 551  | Goban Spur                 | 37°N          | 5°W            | 2100           | -9.9                    | M12, M85        |
| 690  | Maud Rise                  | 65°S          | 6°W            | 1800           | -9.8                    | V13             |
| 525  | Walvis Ridge               | 36°S          | 8°W            | 1000 – 1500    | -3.5                    | V13             |
| 367  | Cape Verde                 | 15°N          | 20°W           | > 2000         | -13.4                   | M12             |
| 700  | East Georgia Basin         | 52°S          | 20°W           | 1500 – 2000    | -8.2                    | M16             |
| 1276 | Newfoundland Margin        | 35°N          | 22°W           | > 2000         | -6.6                    | RV12            |
| 357  | Rio Grande Rise            | 34°S          | 25°W           | 1500           | -9.7                    | MT13            |
| 511  | Falkland Plateau           | 54°S          | 29°W           | > 1000         | -8.7                    | R10             |
| 1261 | Demerara Rise              | 3°N           | 29°W           | 1000 – 1500    | -15.9                   | ML11, M12       |
| 1260 | Demerara Rise              | 5°N           | 31°W           | 1000 – 1500    | -15.2                   | ML08, ML11, M12 |
| 1258 | Demerara Rise              | 6°N           | 32°W           | 1000 – 1500    | -14.8                   | ML08, ML11, M12 |
| 386  | Bermuda Rise               | 26°N          | 40°W           | > 2000         | -9.5                    | M12, RV12       |
| 1050 | Blake Nose                 | 30°N          | 54°W           | 1000 – 2000    | -8.5                    | M12             |
| 152  | Nicaraguan Rise            | 15°N          | 70°W           | 1500 – 2000    | -5.7                    | M16             |
| 323  | Bellingshausen Plateau     | 67°S          | 100°W          | 2000           | -3.8                    | T14             |
| 596  | South Pacific              | 45°S          | 120°W          | 5000           | -5.6                    | T14             |
| 1186 | Ontong-Java Plateau        | 15°S          | 132°W          | 2800           | -5.1                    | H19             |
| 465  | Southern Hess Rise         | 8°N           | 138°W          | 900            | -3.8                    | H12             |
| 464  | Northern Hess Rise         | 12°N          | 140°W          | 4000           | -5.1                    | H12             |
| 883  | Detroit Seamount           | 34°N          | 140°W          | 2000           | 2.4                     | H12, DT04       |
| 886  | Chinook Trough             | 30°N          | 140°W          | > 4400         | -4.2                    | ML08            |
| 463  | Mid-Pacific Mountains      | 5°S           | 145°W          | 1500 – 2000    | -5.0                    | H19             |

|      |              |      |       |             |      |          |
|------|--------------|------|-------|-------------|------|----------|
| 1208 | Shatsky Rise | 15°N | 154°W | 3300        | -4.0 | H12      |
| 1209 | Shatsky Rise | 12°N | 158°W | 2000 – 3000 | -4.3 | T04, F05 |
| 1210 | Shatsky Rise | 10°N | 160°W | 2000 – 3000 | -4.3 | F05      |
| 1211 | Shatsky Rise | 8°N  | 162°W | 2900        | -4.2 | T04      |

**Table S3.** Maastrichtian  $\epsilon_{Nd}$  compilation based on Moiroud et al. (2016). The  $\epsilon_{Nd}$  values are averaged between 75 Ma and 65 Ma (see main text). DT04: Doubrovine and Tarduno (2004), F05: Frank et al. (2005), GL92: Gradstein and Ludden (1992), H12: Hague et al. (2012), H19: Haynes et al. (2019) in review, LH12: Le Houedec et al. (2012), M12: Martin et al. (2012), M16: Moiroud et al. (2016), M85: Masson et al. (1985), ML08: MacLeod et al. (2008), ML11: MacLeod et al. (2011), MT12: Murphy and Thomas (2012), MT13: Murphy and Thomas (2013), R10: Robinson et al. (2010), RV12: Robinson and Vance (2012), T04: Thomas (2004), T14: Thomas et al. (2014), V13: Voigt et al. (2013).

16

17

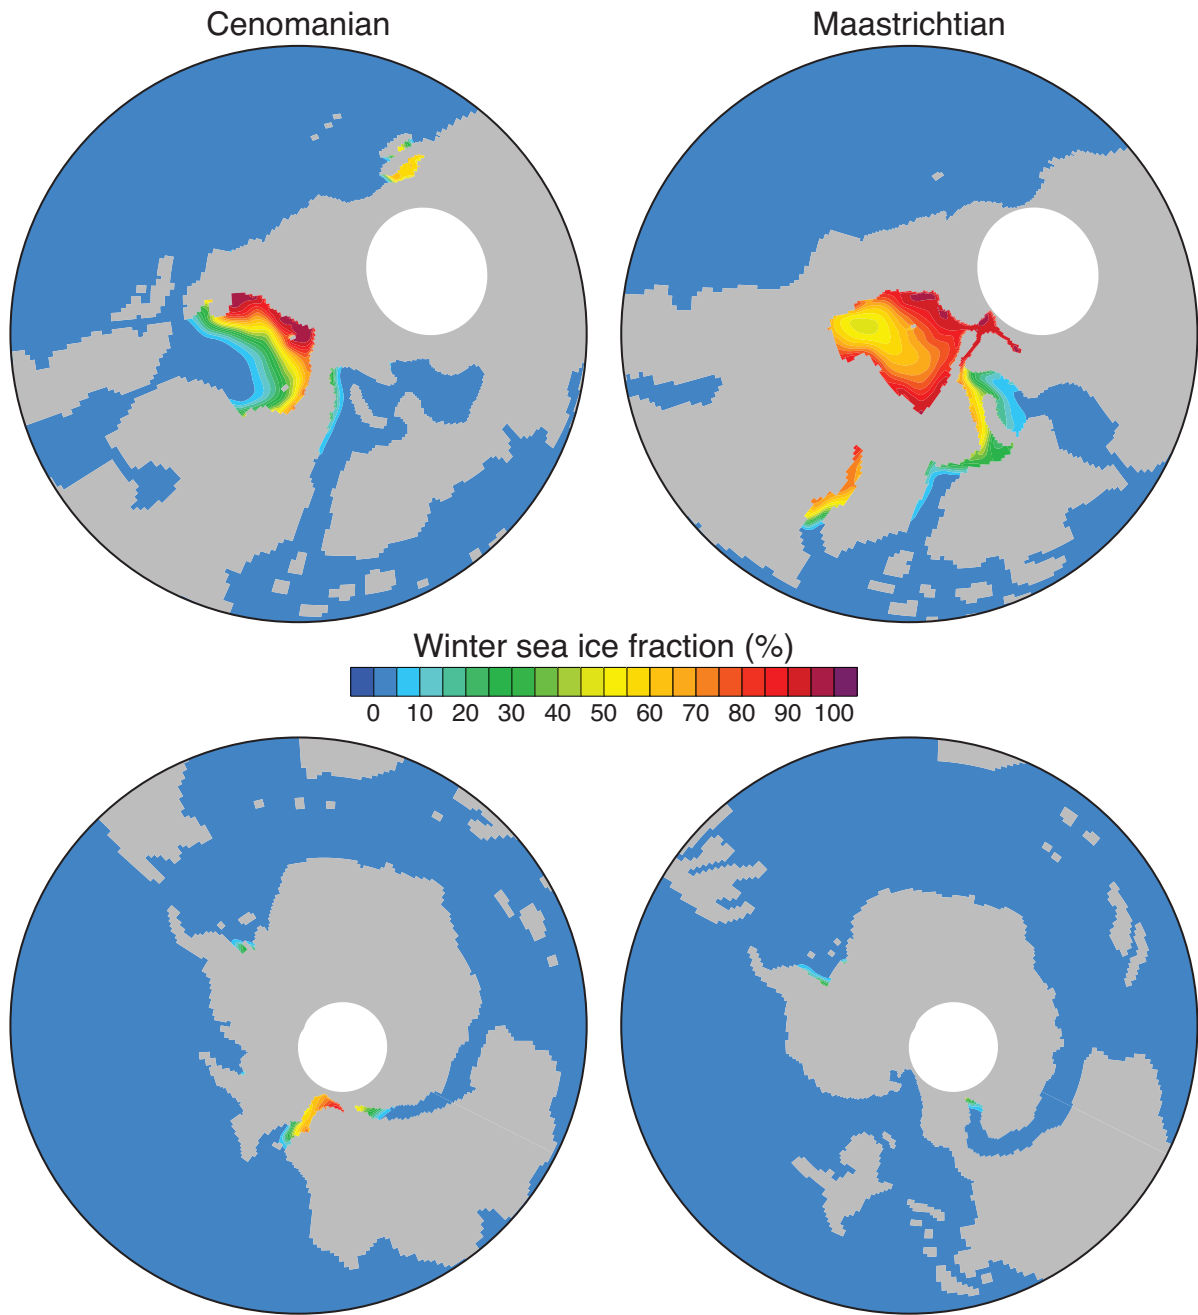

**Figure S1.** Mean winter sea ice fraction in the Cenomanian and Maastrichtian simulations.

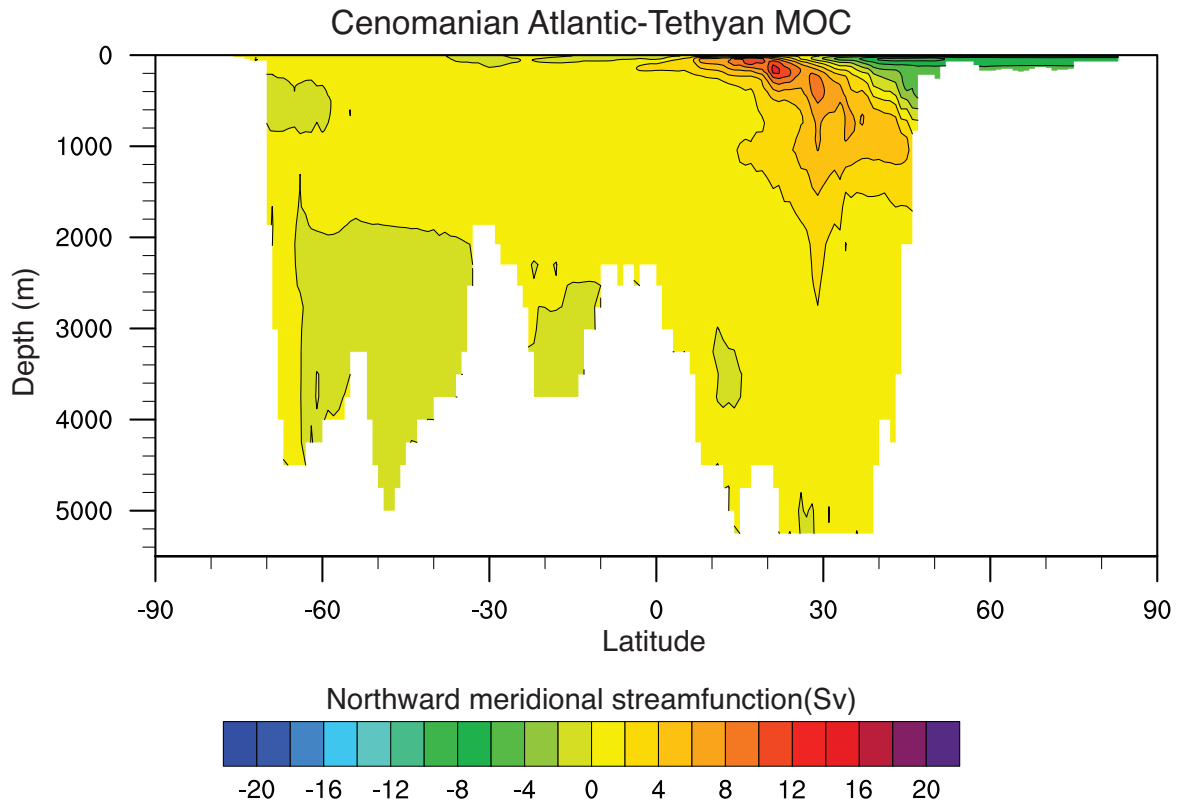

**Figure S2.** Meridional Overturning Circulation (Sv) in the Atlantic-Tethyan basin of the Cenomanian simulation (Fig. S3).

19

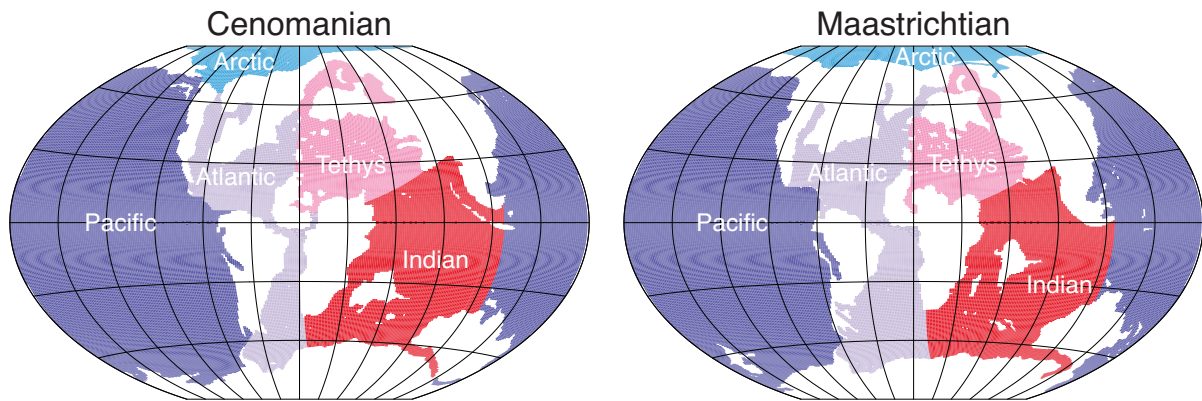

**Figure S3.** Configuration of the basin mask used in each simulation.

20

Cenomanian intermediate circulation  
in the Indian Ocean

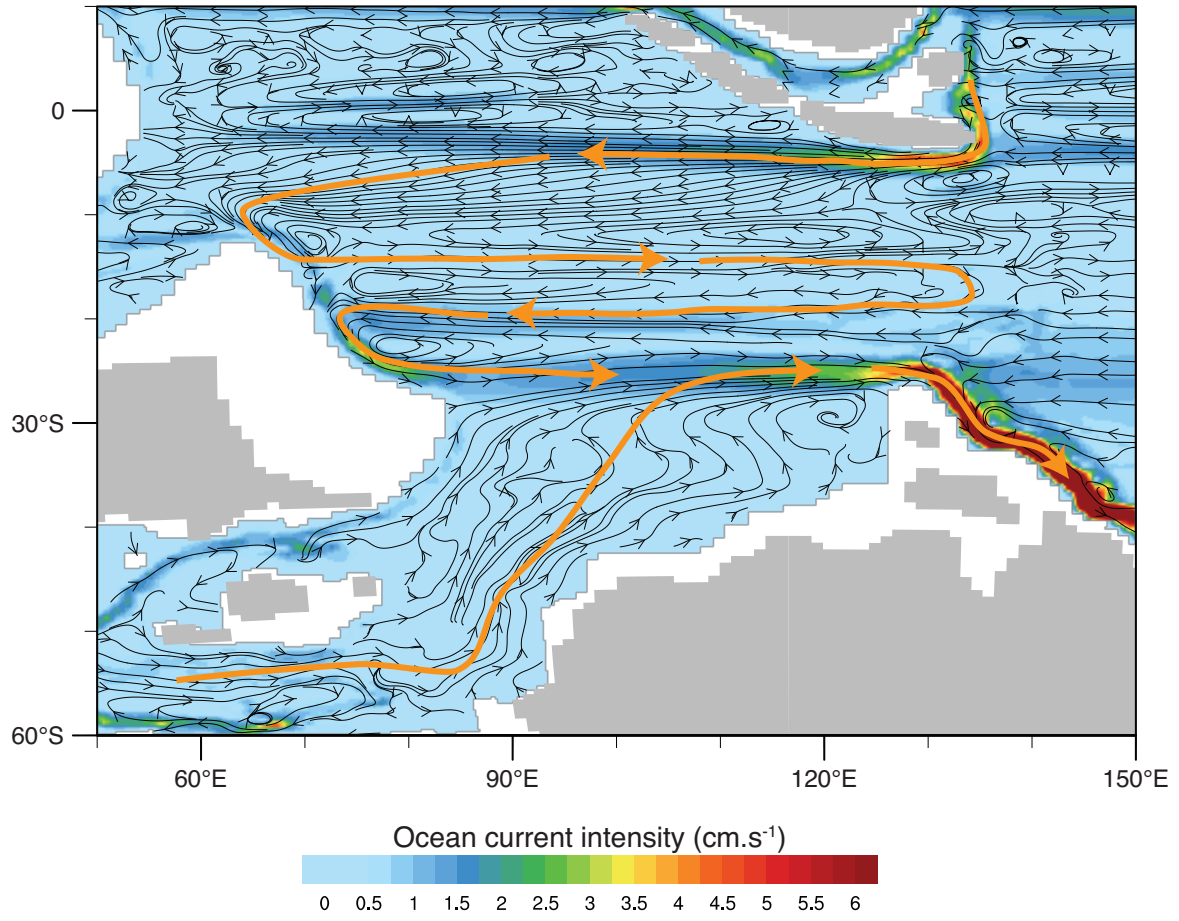

**Figure S4.** Cenomanian intermediate circulation (1000 m) in the Indian Ocean. Orange arrows represent major intermediate current systems in the Indian Ocean.

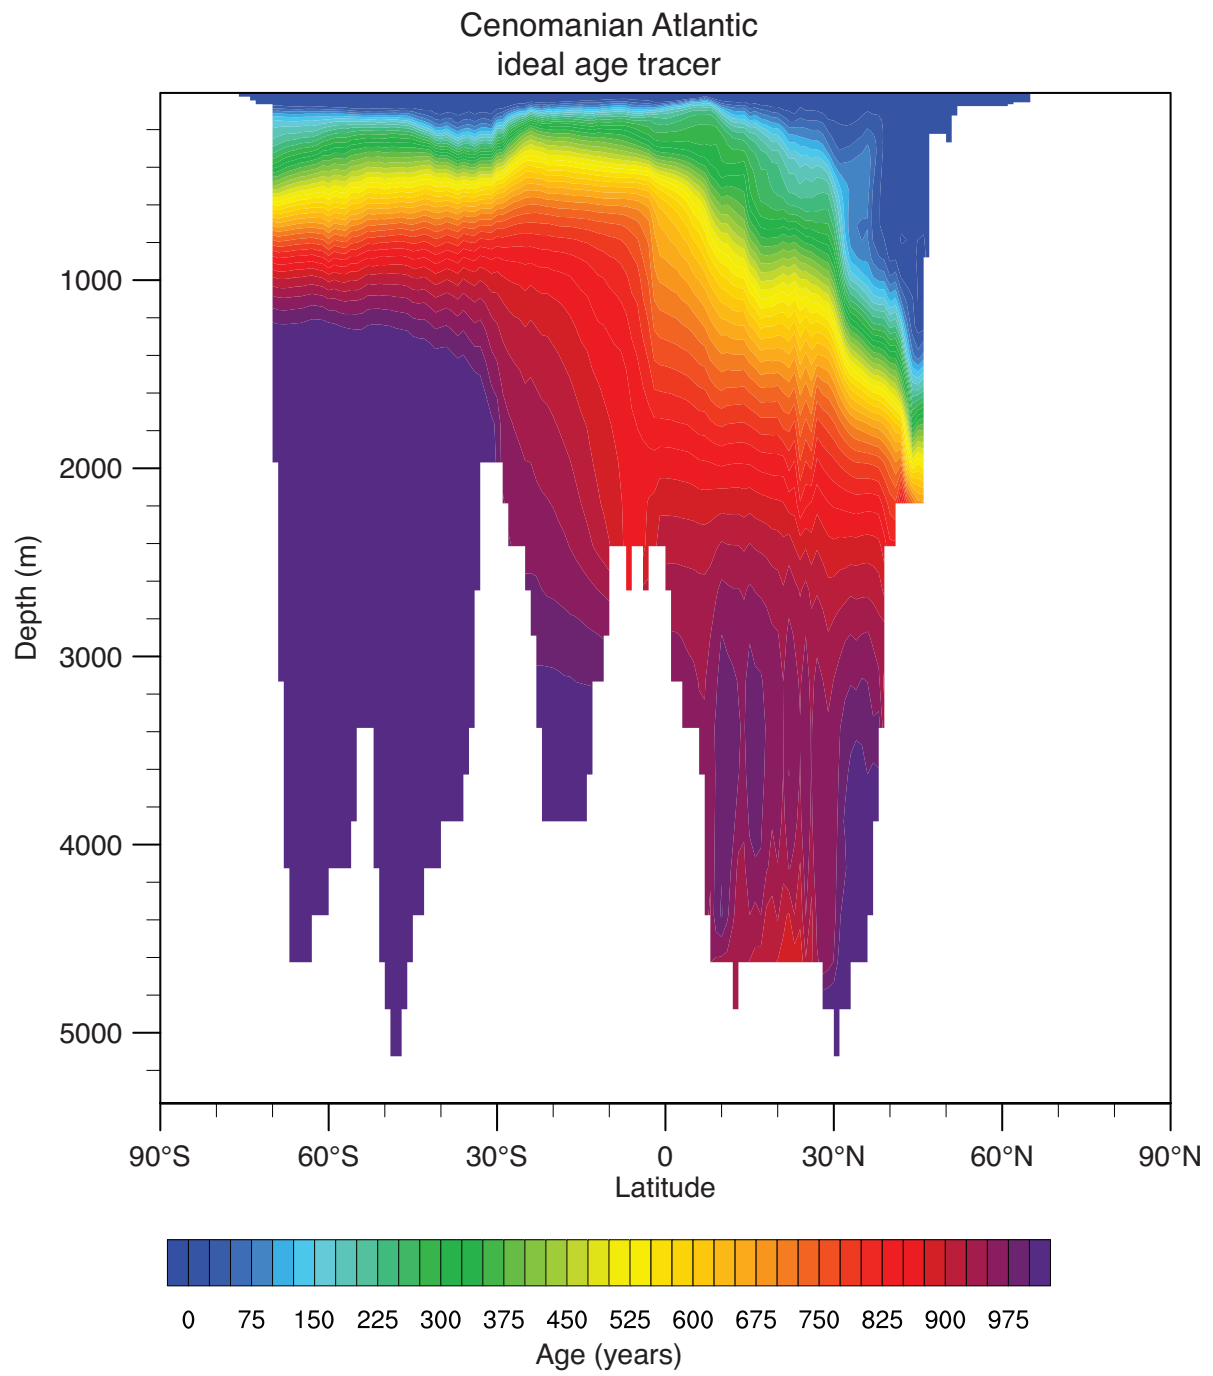

**Figure S5.** Cenomanian annual mean ideal age tracer in the Atlantic basin.



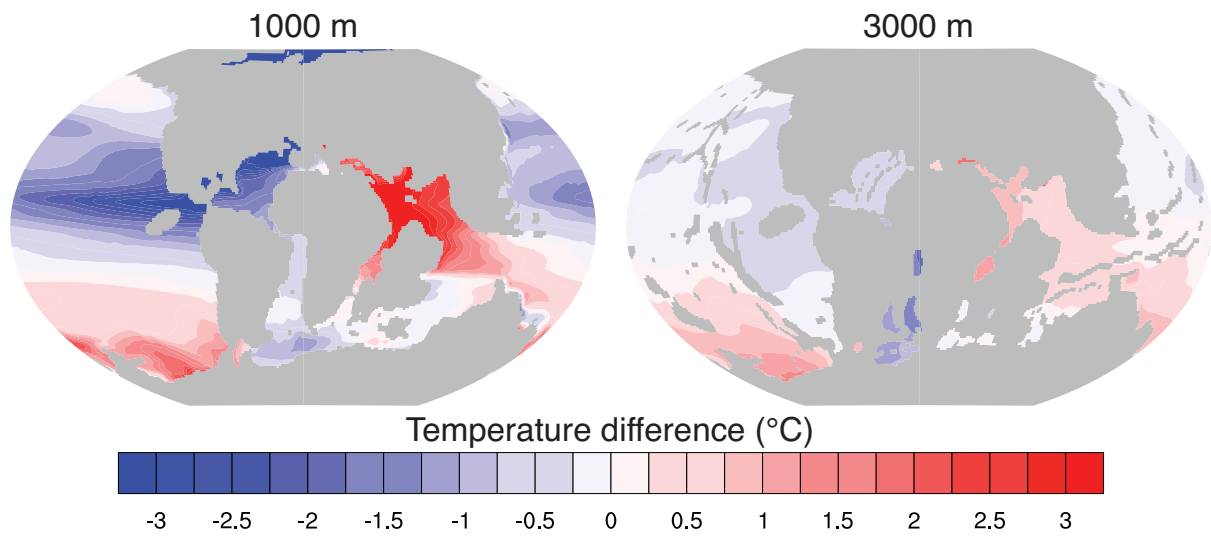

**Figure S6.** Intermediate (~1000 m) and deep (~3000 m) ocean temperature difference (°C) between the Maastrichtian and the Cenomanian simulations.

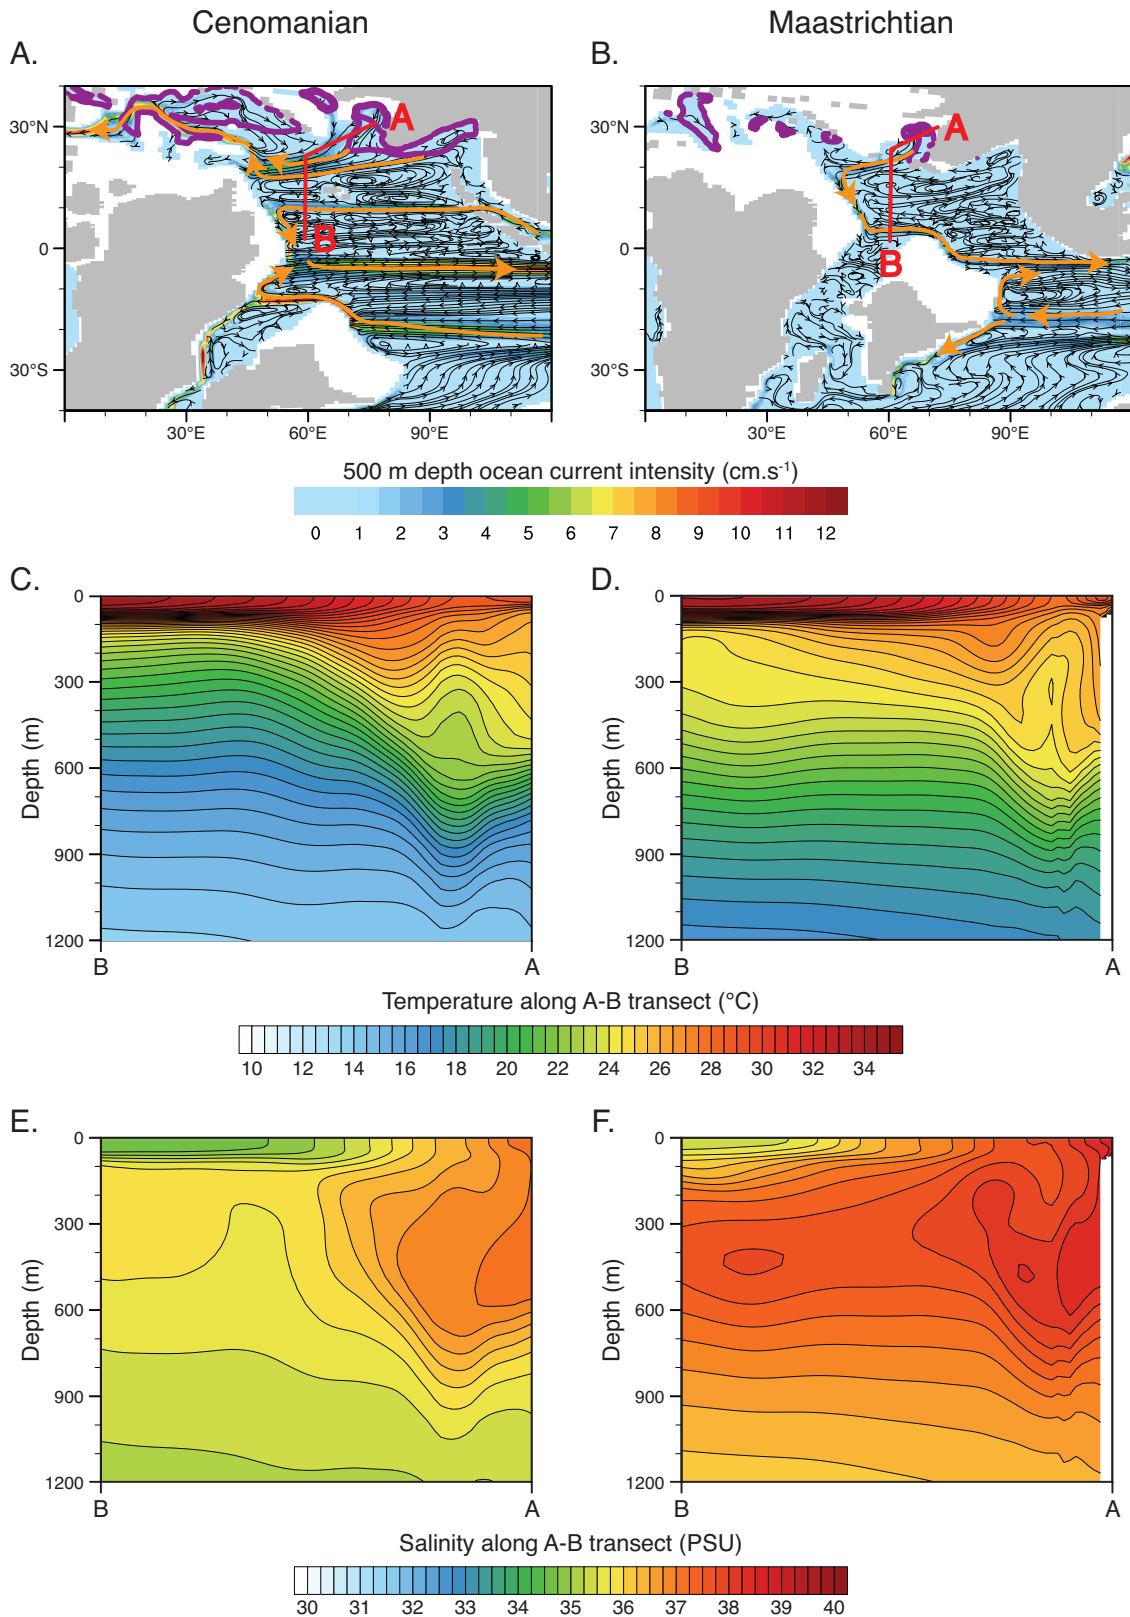

**Figure S7.** Upper intermediate ( $\sim 500$  m) ocean circulation for the Cenomanian (A) and Maastrichtian (B) simulations. Orange arrows represent major current systems in the northern

Indian Ocean. Purple contours represent regions of late winter deepening of the mixed layer (200 m contours). Section A-B defines an ocean transect between regions of deeper winter MLD and the central equatorial Indian Ocean. (C and D) Ocean temperatures along the A-B transect for the Cenomanian and Maastrichtian respectively. (E and F) Same as C and D for the ocean salinity.

24

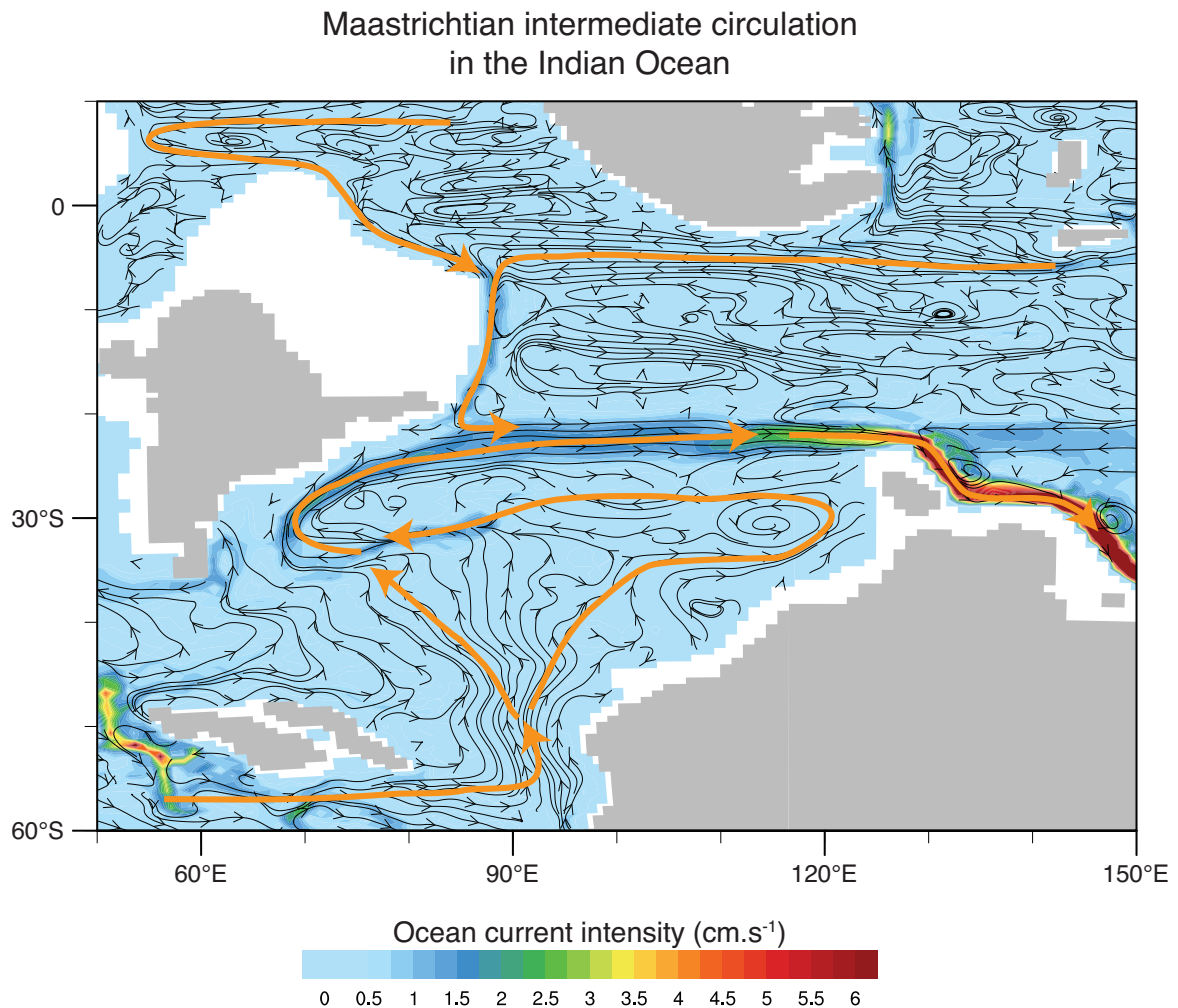

**Figure S8.** Maastrichtian intermediate circulation (1000 m) in the Indian Ocean. Orange arrows represent major intermediate current systems in the Indian Ocean.

25

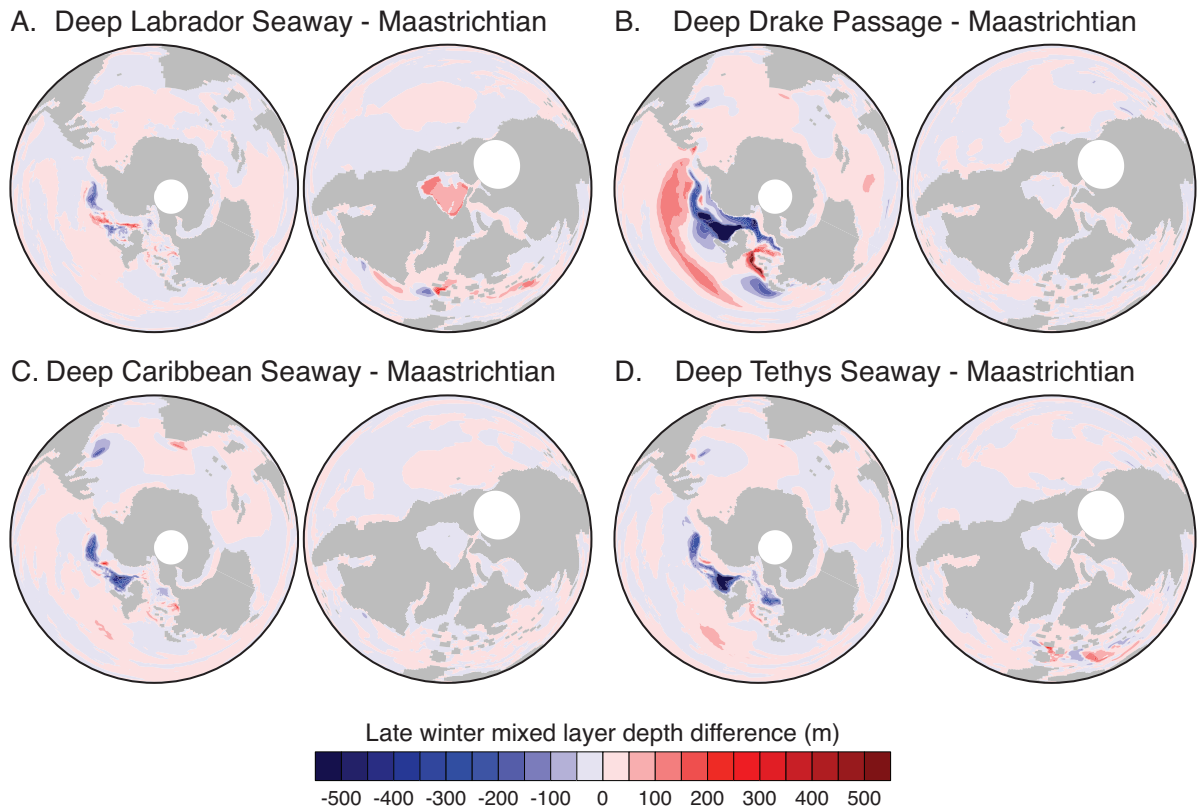

**Figure S9.** Southern and Northern hemispheres late winter maximal mixed layer depth difference (m) between the sensitivity experiments and the Maastrichtian simulation.

### Deep Labrador Seaway - Maastrichtian

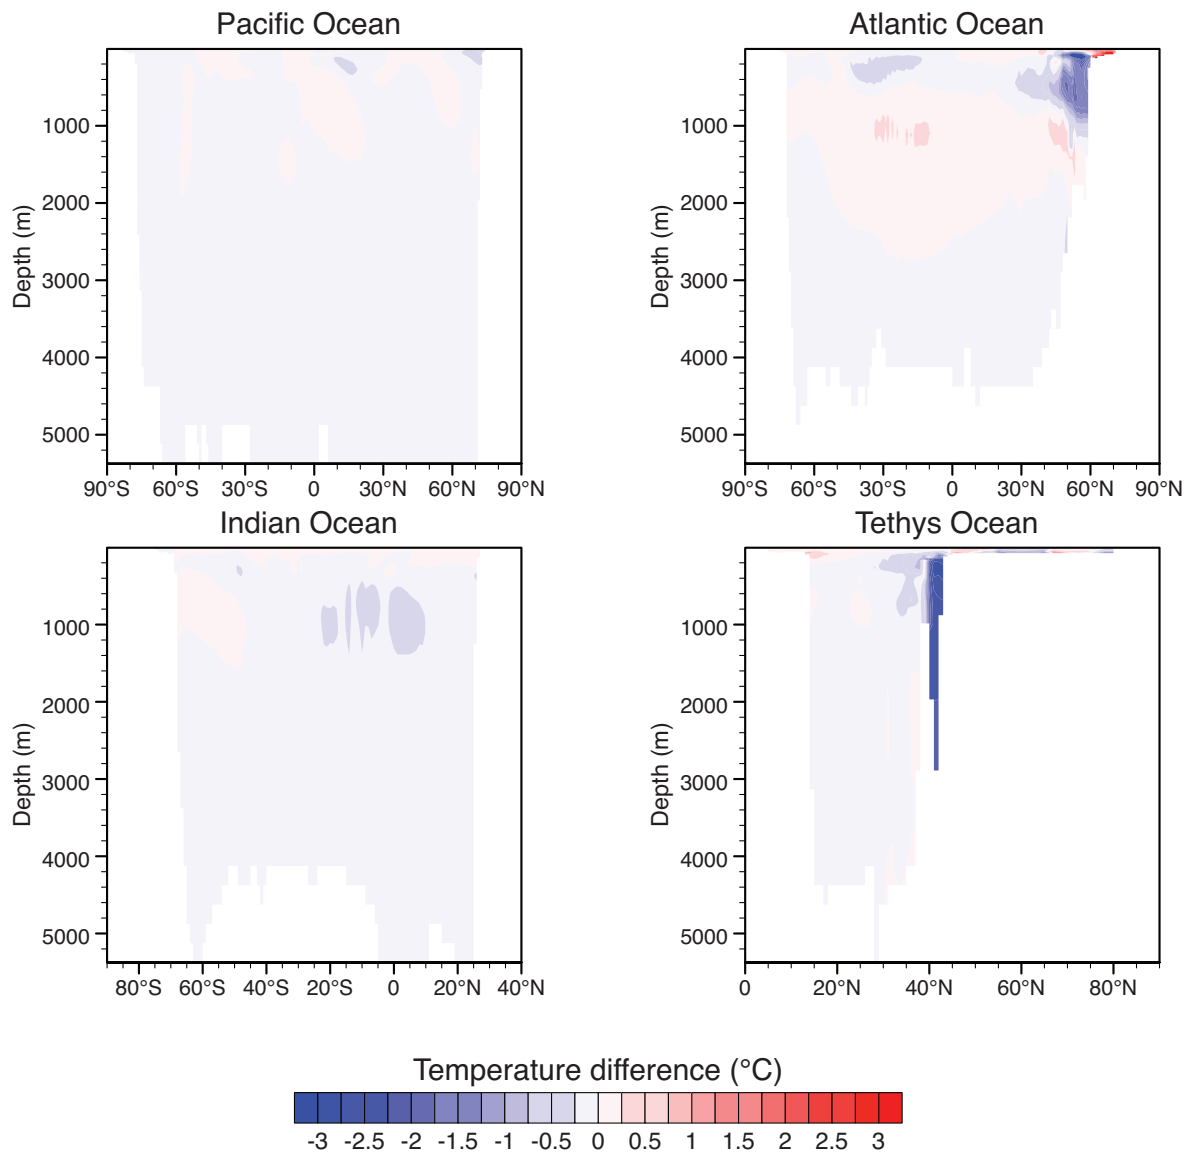

**Figure S10.** Zonally averaged ocean temperature changes ( $^{\circ}\text{C}$ ) in the different basins between the Deep Labrador Seaway and the Maastrichtian simulations.

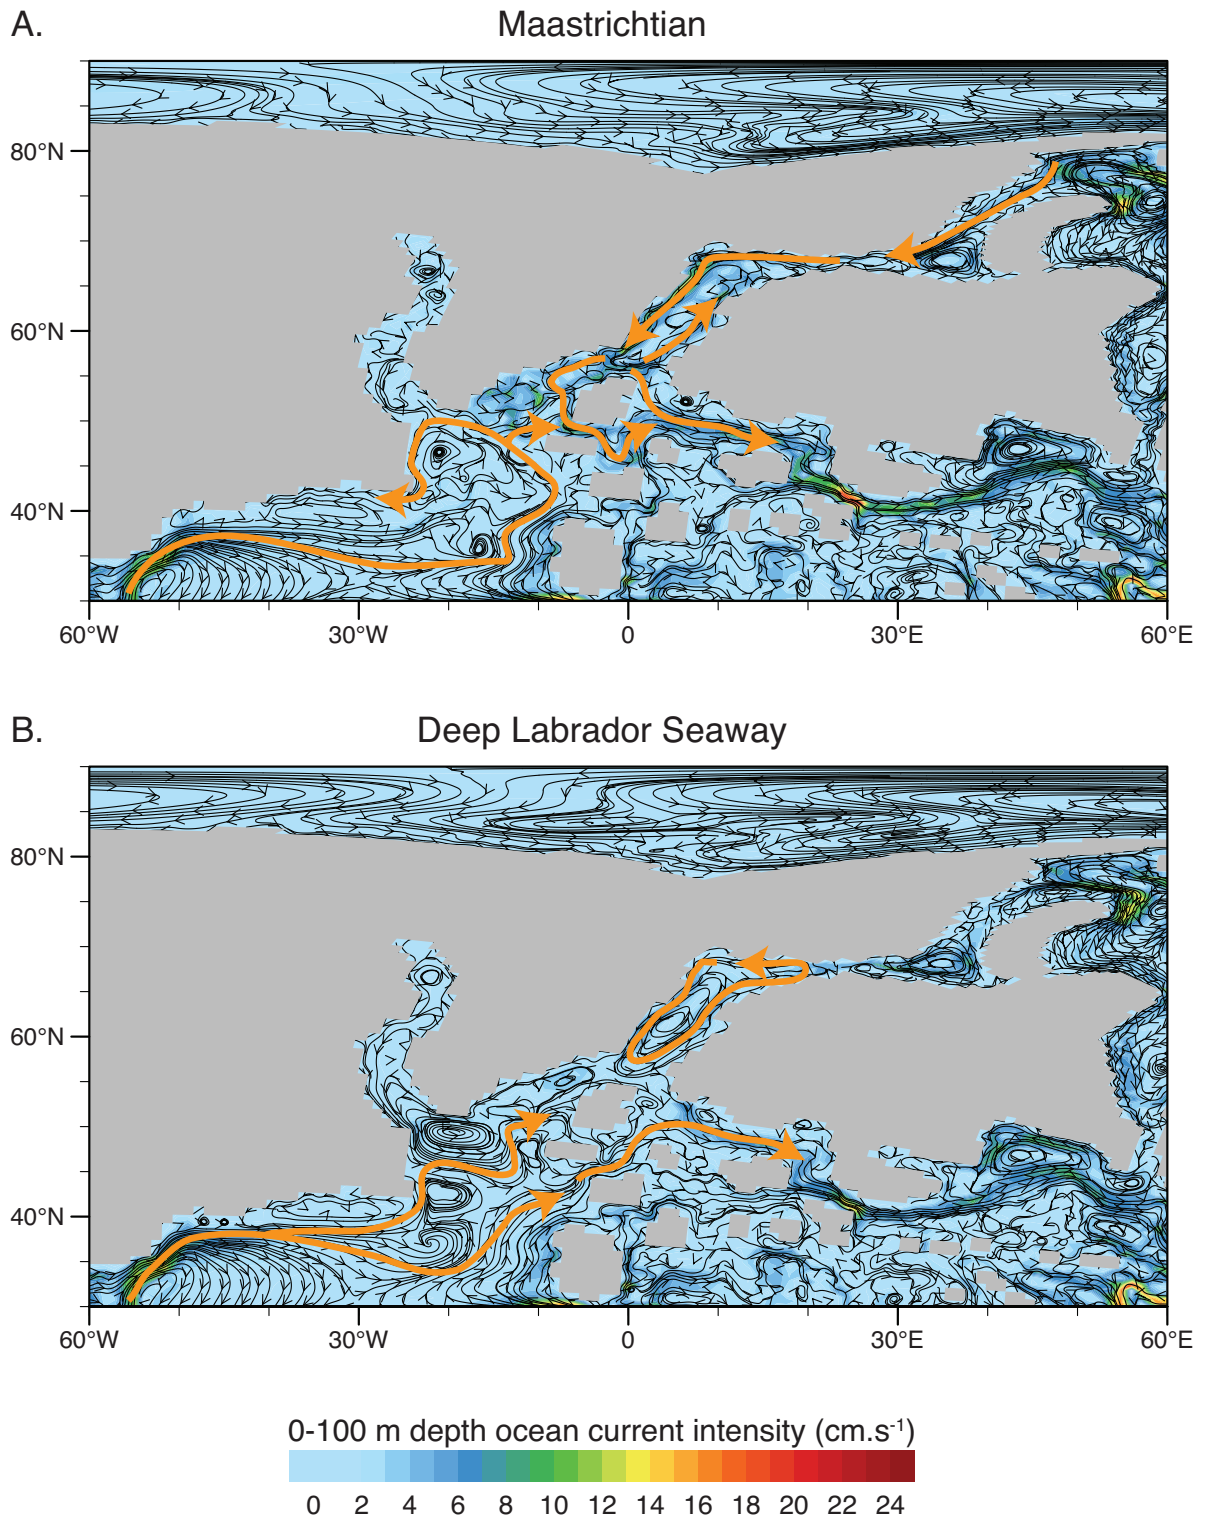

**Figure S11.** North Atlantic and northern Tethys upper ocean circulation in (A) the Maastrichtian and (B) the Deep Labrador Seaway experiments. Orange arrows represent major current systems.

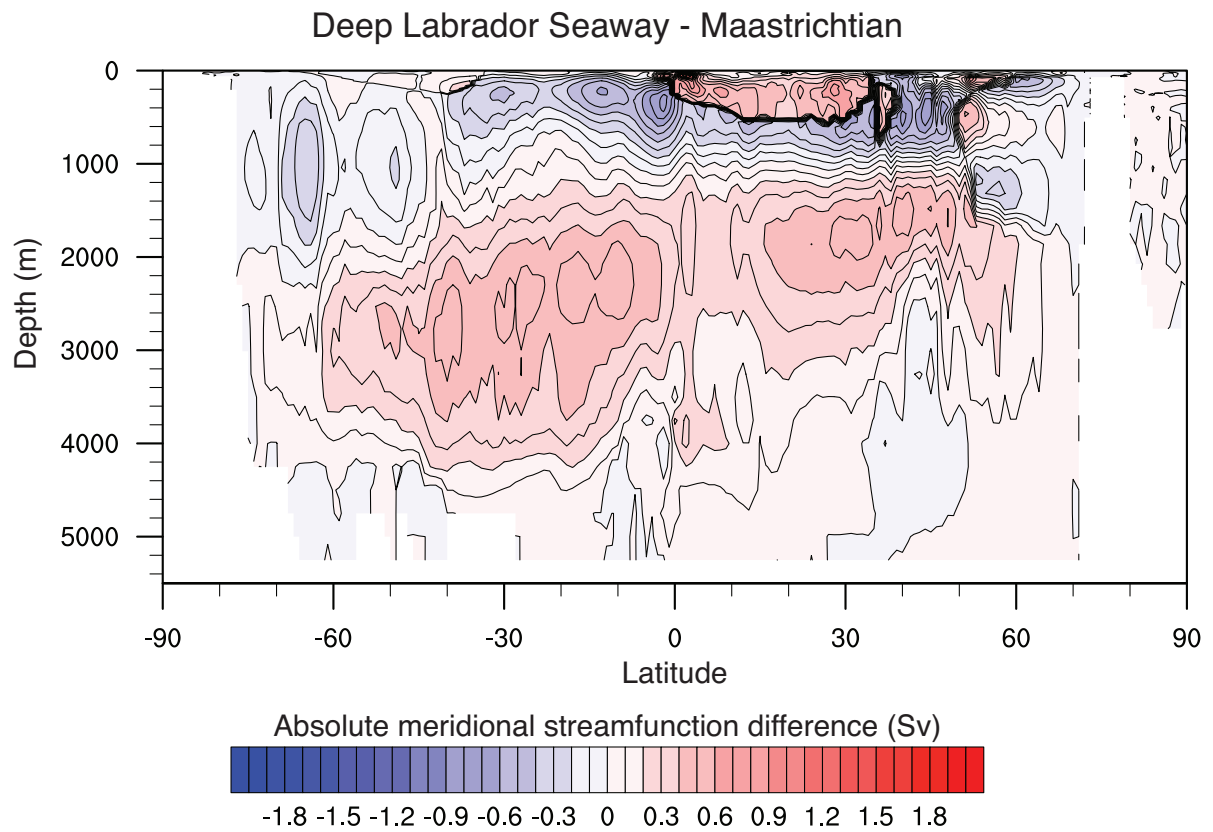

**Figure S12.** Difference of the absolute values of the global northward meridional streamfunction between the Deep Labrador Seaway and the Maastrichtian experiments. Positive values indicate a more vigorous circulation regardless of the sign of the global streamfunction in each simulation because the two global streamfunctions are very similar (Fig. 4B and 4C).

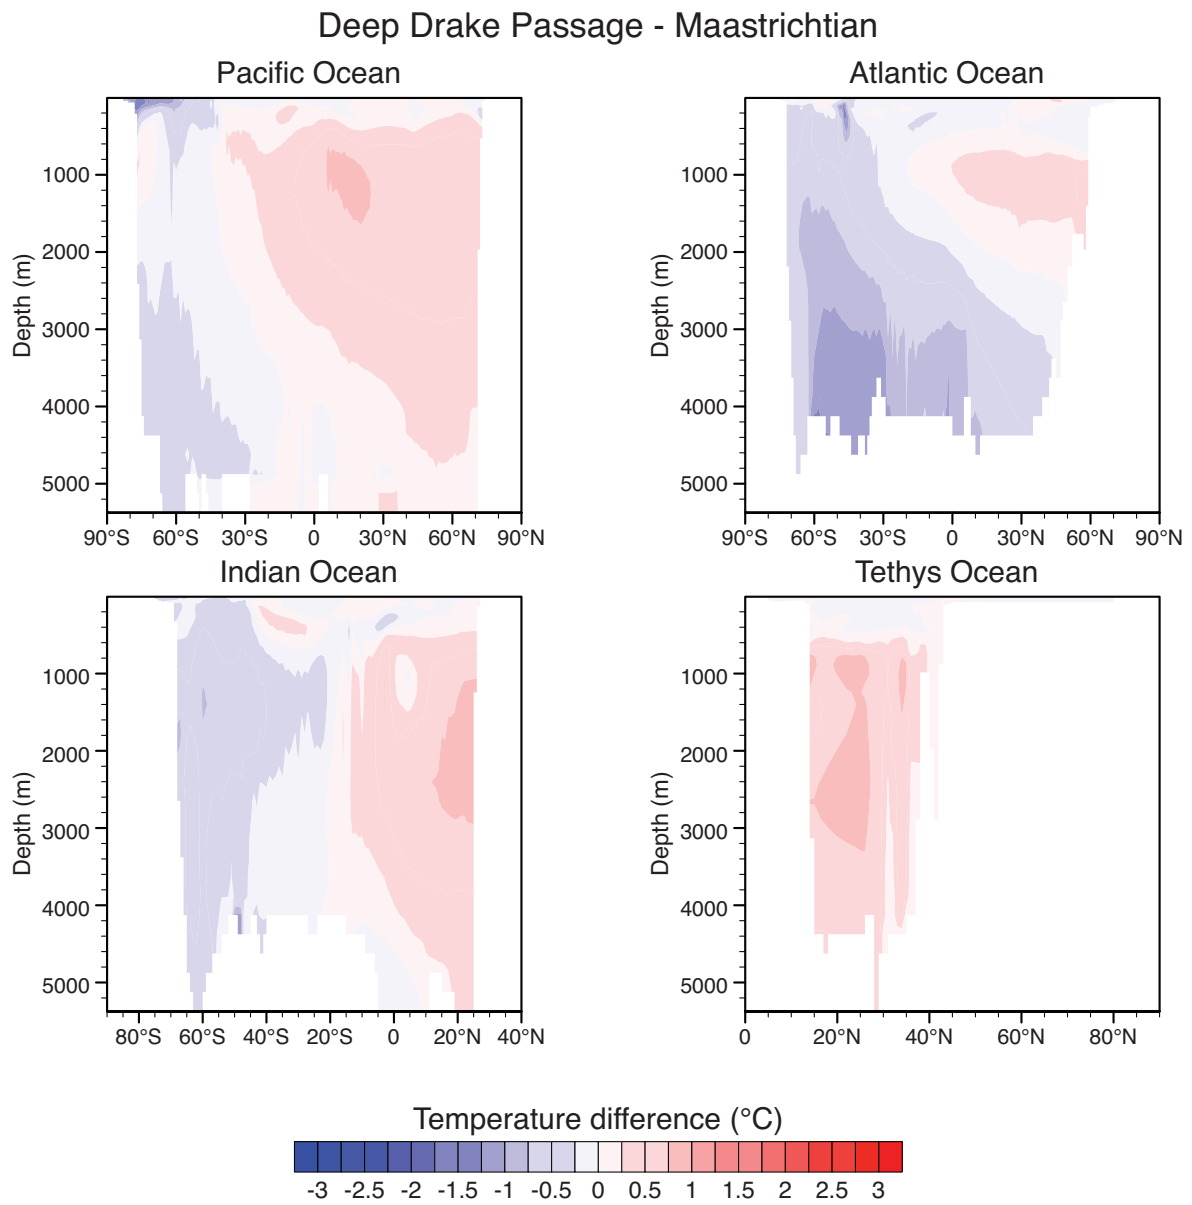

**Figure S13.** Zonally averaged ocean temperature changes (°C) in the different basins between the Deep Drake Passage and the Maastrichtian simulations.



### Water flux across the Indonesian section

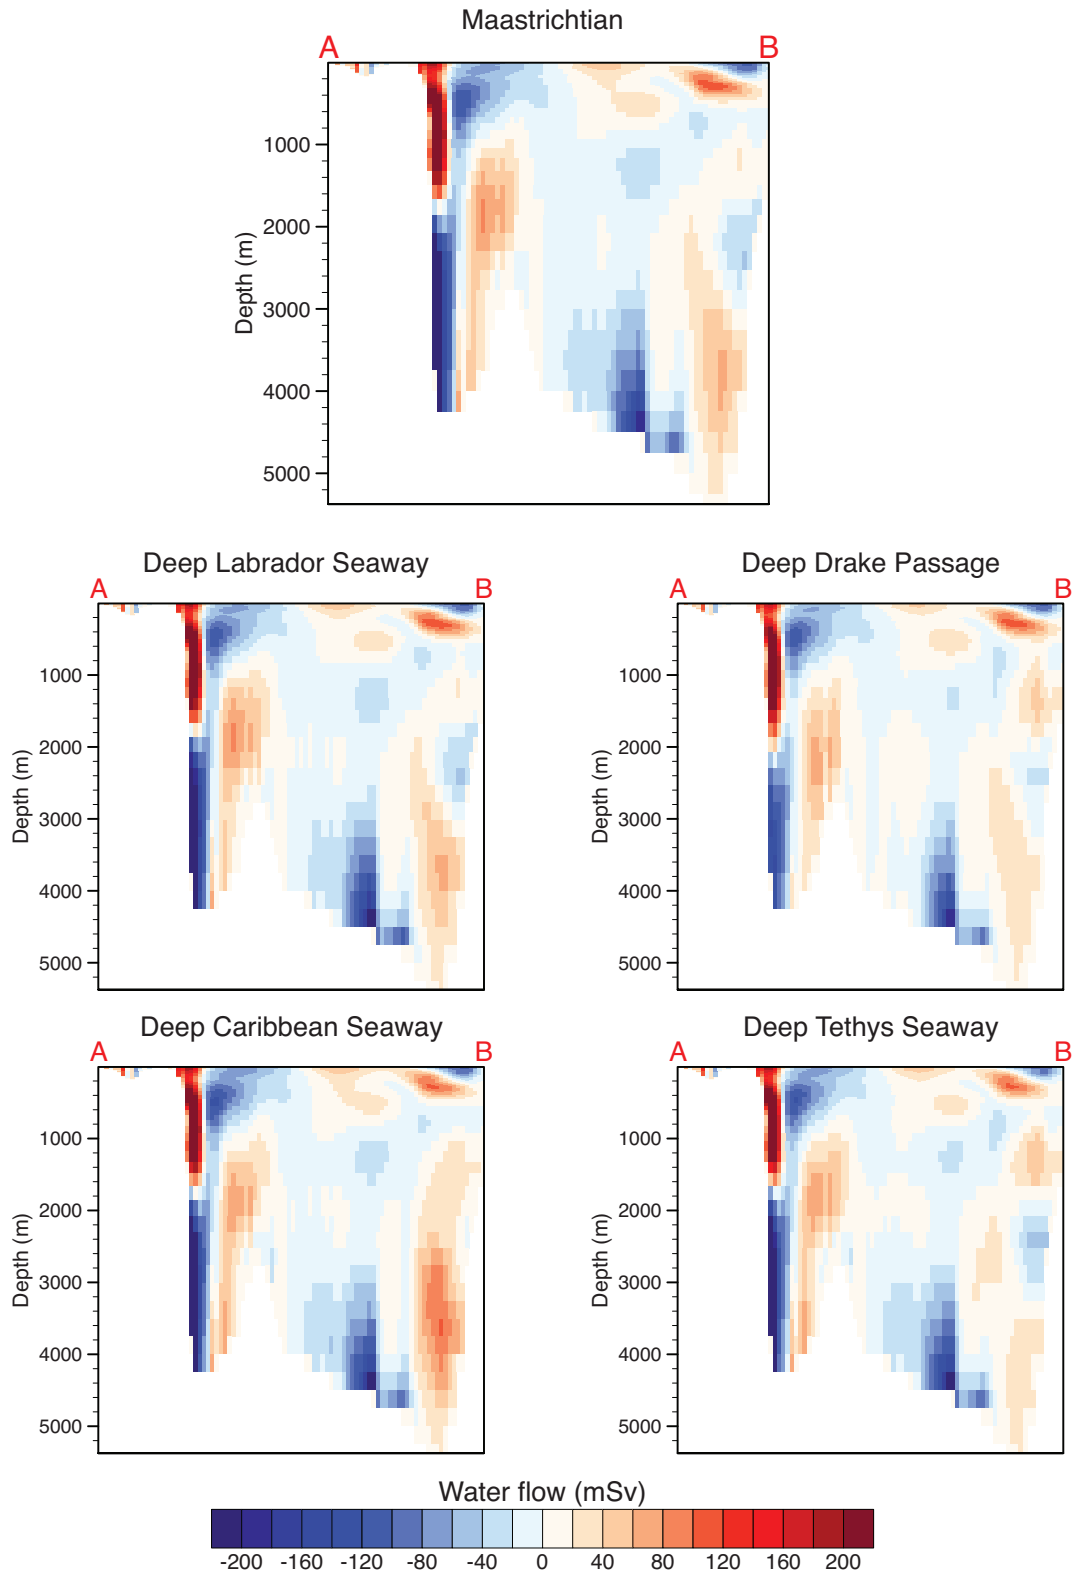

**Figure S14.** Water flux across the Indonesian section (mSv) for the Maastrichtian and Maastrichtian sensitivity experiments.

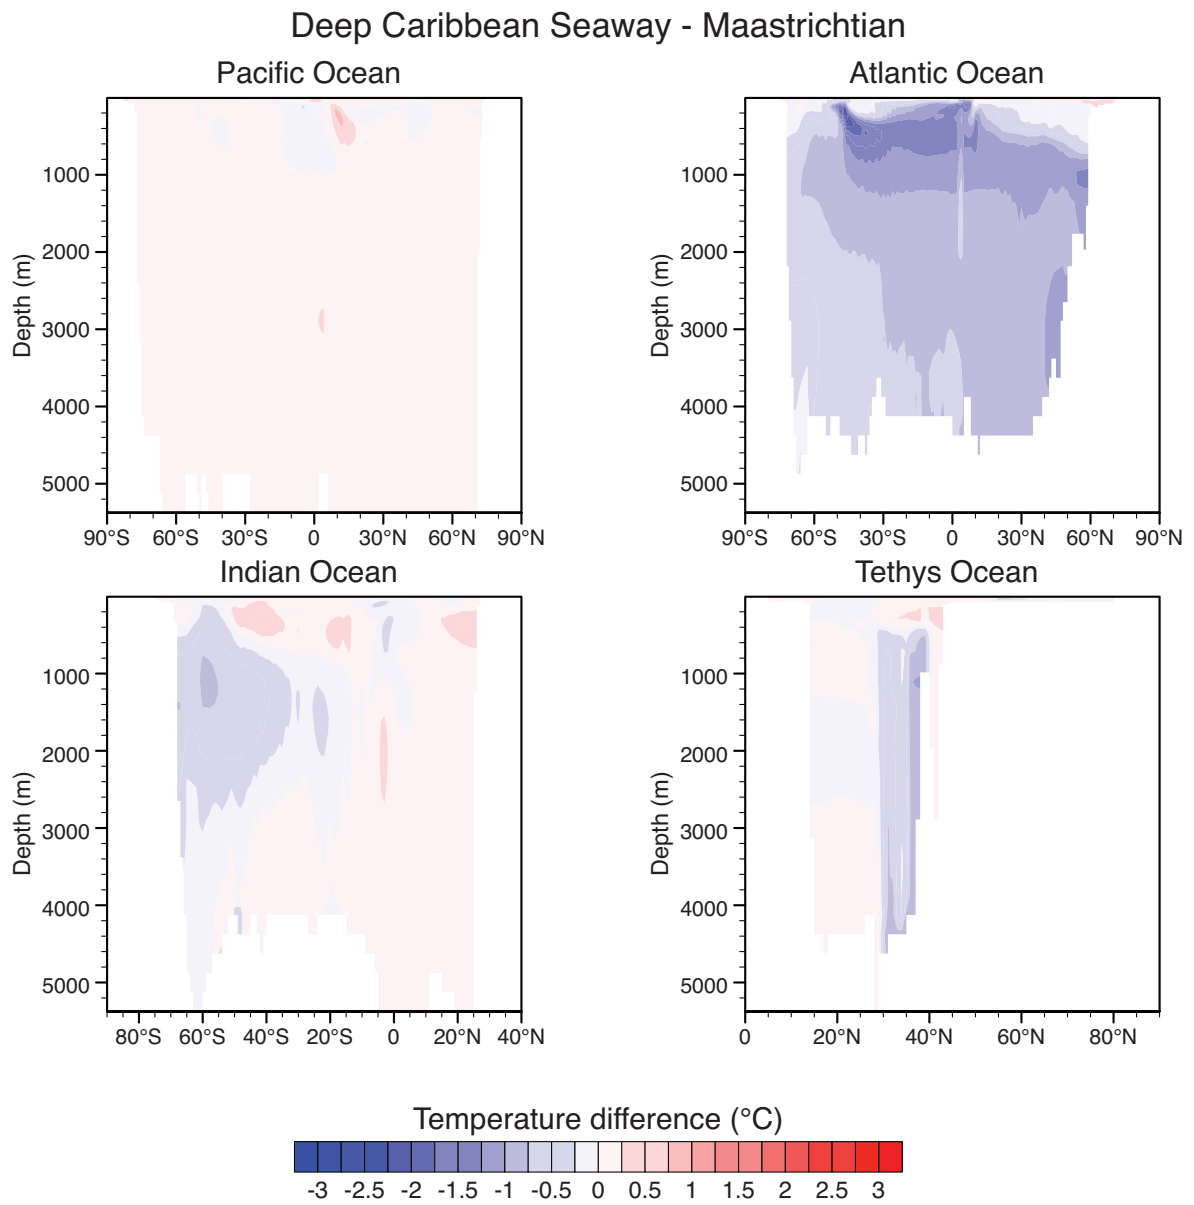

**Figure S15.** Zonally averaged ocean temperature changes (°C) in the different basins between the Deep Caribbean Seaway and the Maastrichtian simulations.

## Deep Tethys Seaway - Maastrichtian

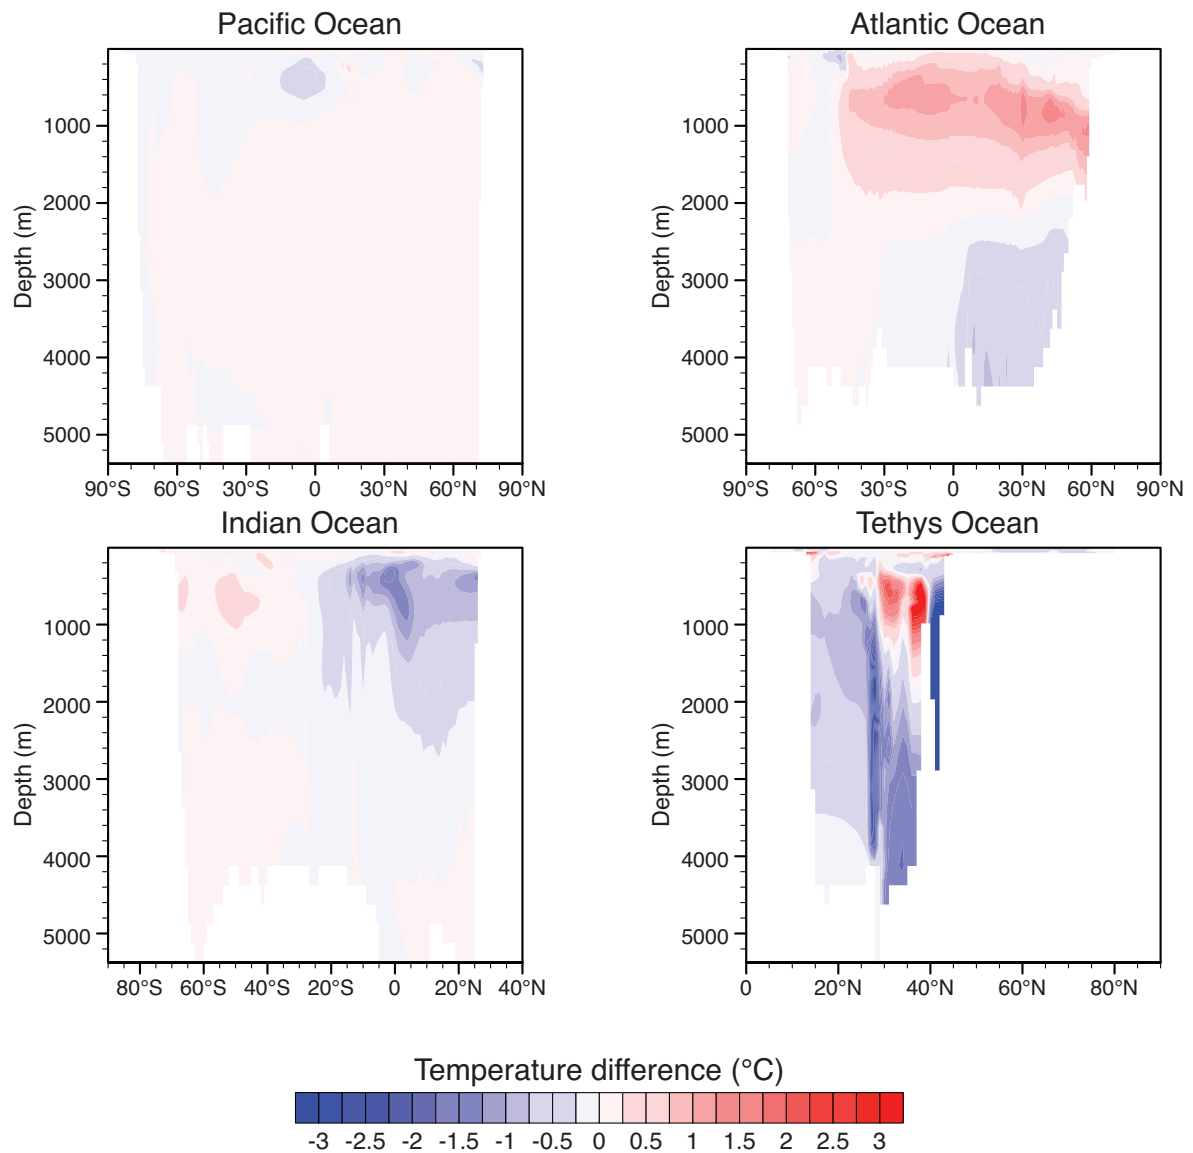

**Figure S16.** Zonally averaged ocean temperature changes (°C) in the different basins between the Deep Tethys Seaway and the Maastrichtian simulations.

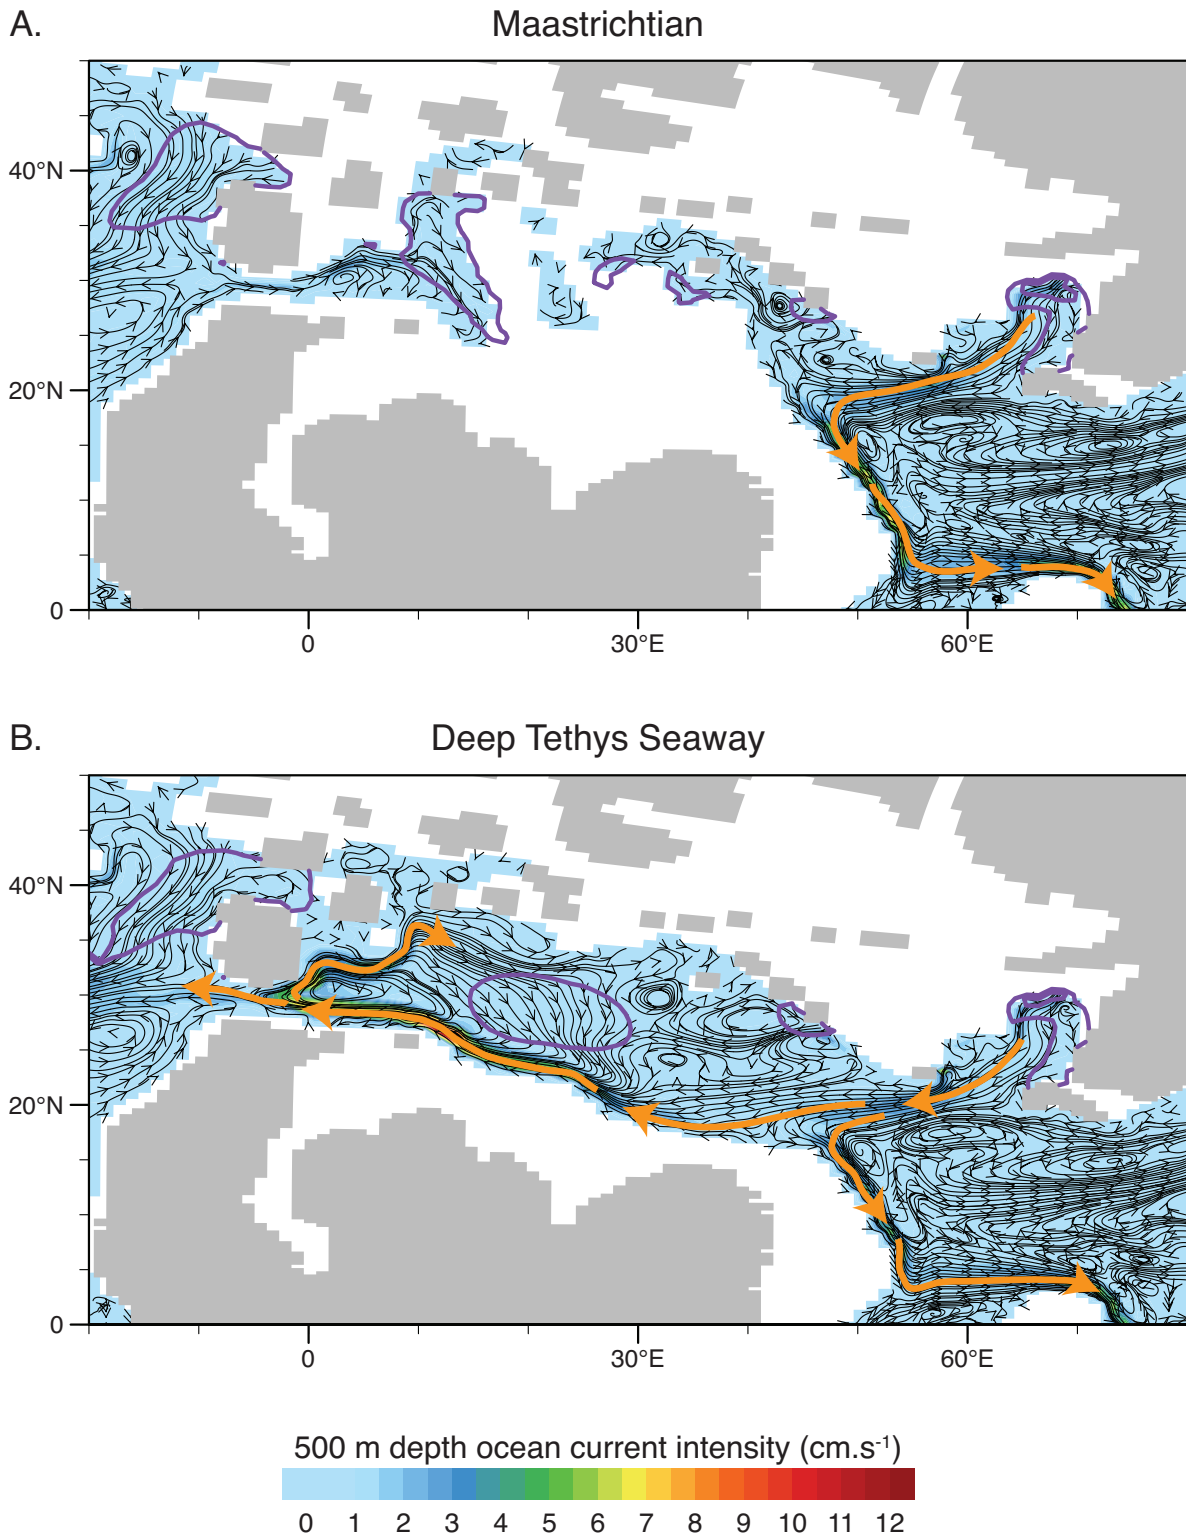

**Figure S17.** Tethys upper intermediate ( $\sim 500$  m) ocean circulation in (A) the Maastrichtian and (B) the Deep Tethys Seaway experiments. Orange arrows represent major current systems. Purple contours represent regions of late winter deepening of the mixed layer (200 m contours).

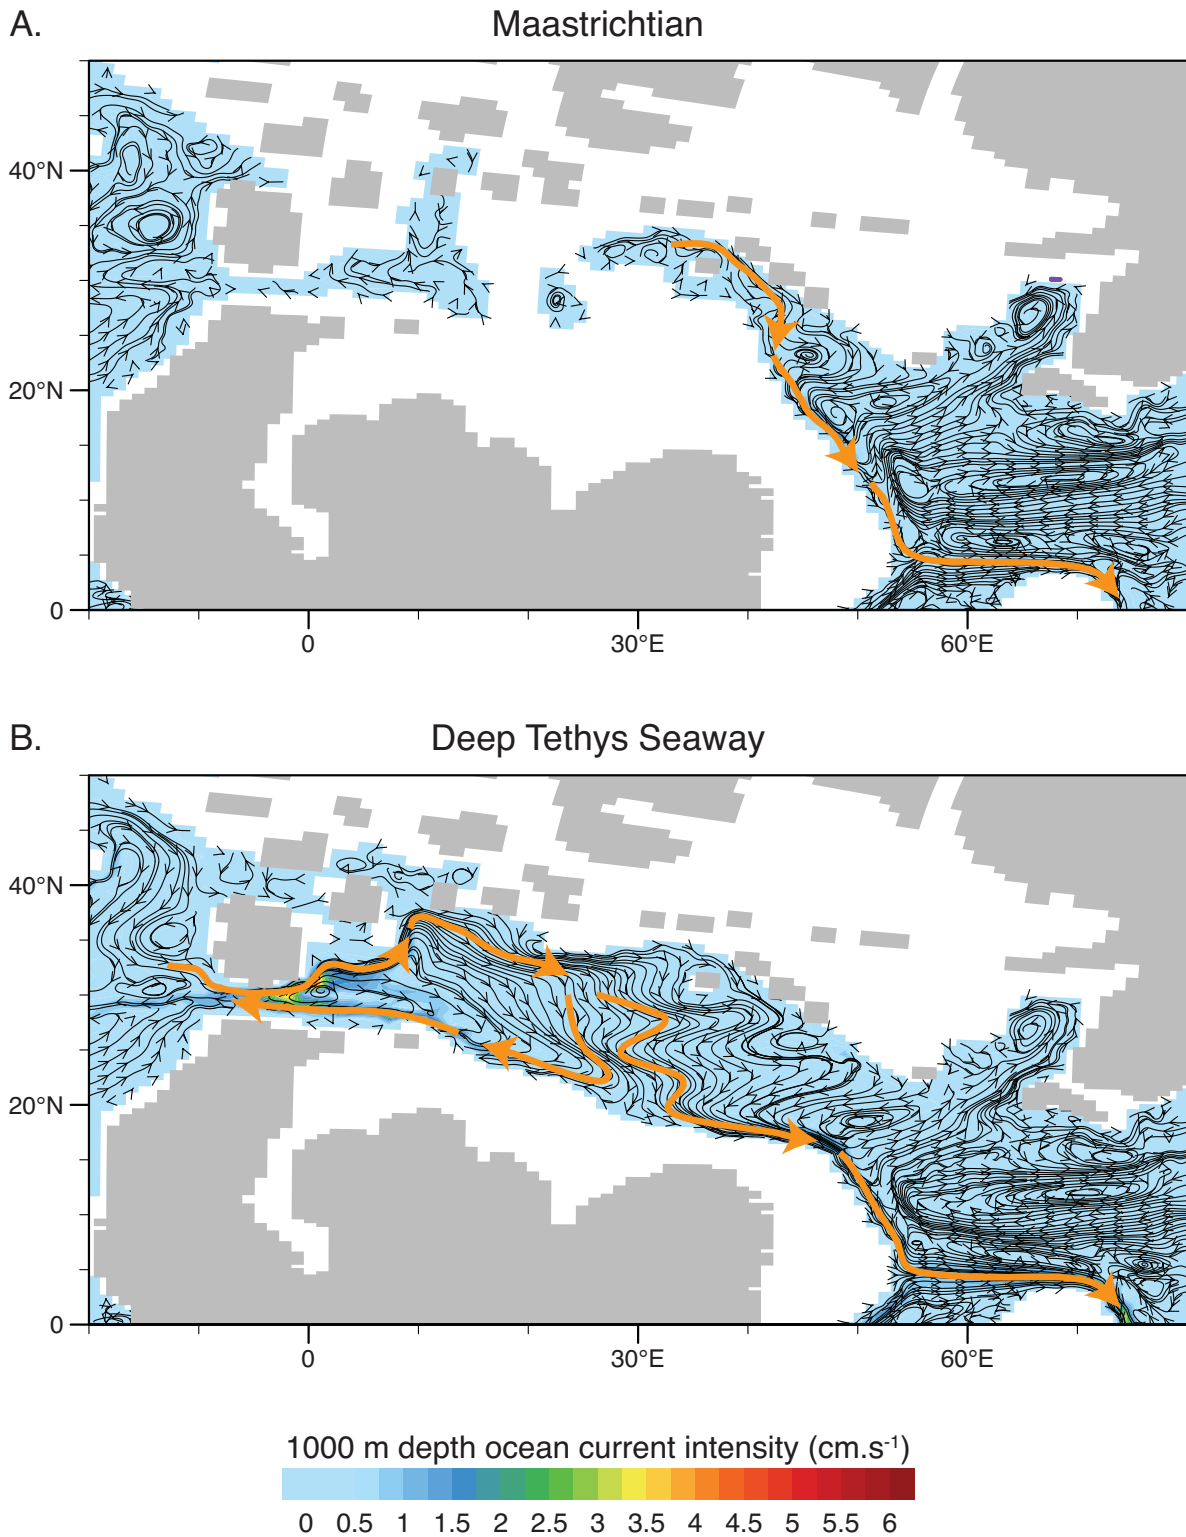

**Figure S18.** Tethys deep intermediate ( $\sim 1000$  m) ocean circulation in (A) the Maastrichtian and (B) the Deep Tethys Seaway experiments. Orange arrows represent major current systems.

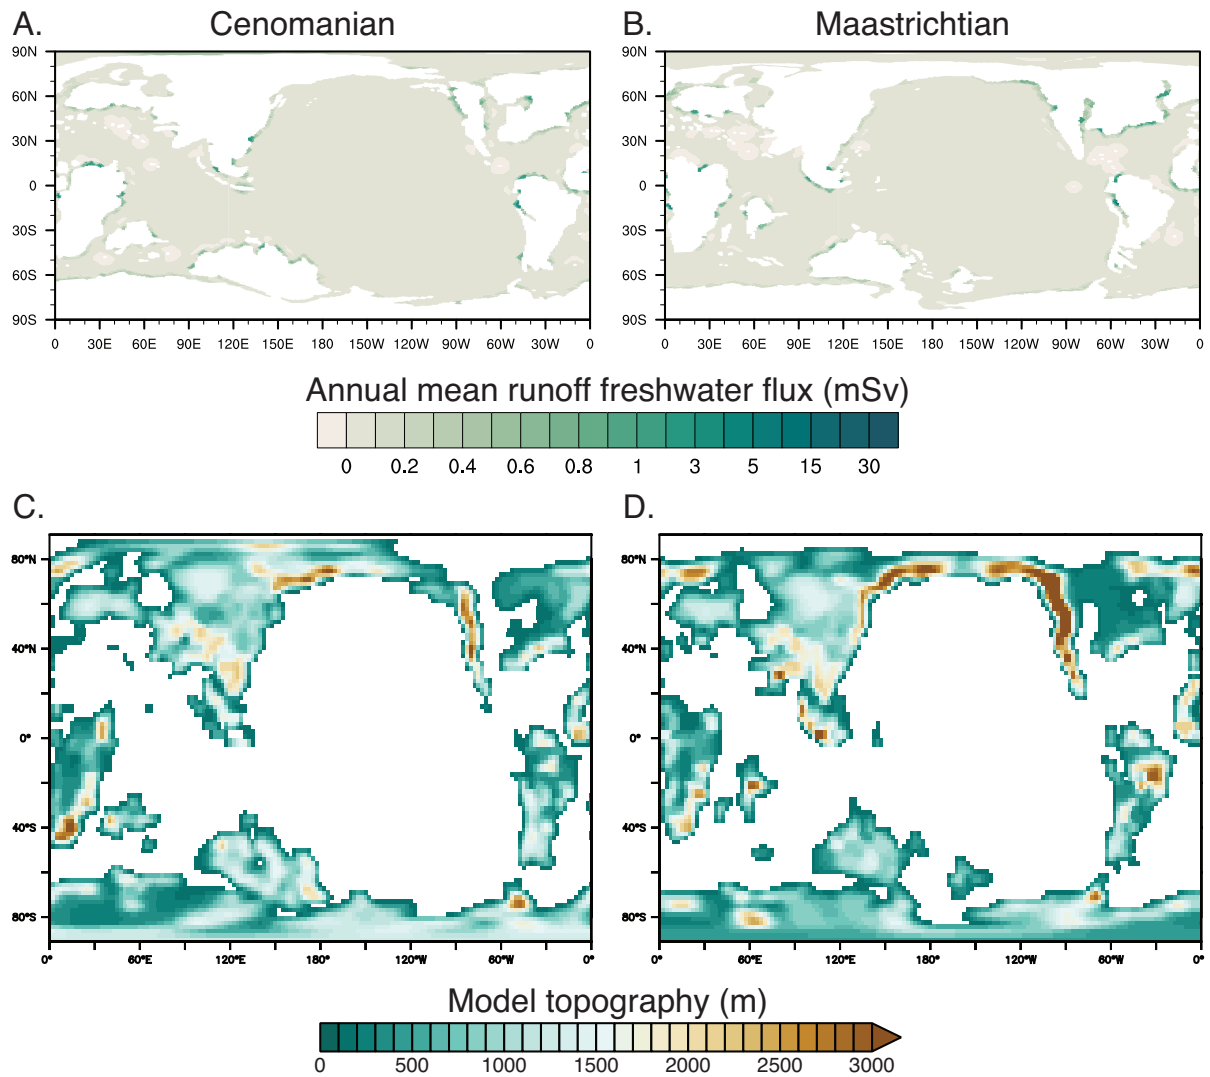

**Figure S19.** Annual mean runoff freshwater discharge into the ocean (mSv) for (A) the Cenomanian and (B) the Maastrichtian simulations. (C) Cenomanian topography seen by the CAM4 atmospheric model. (D) Same for the Maastrichtian.

36  
 37  
 38  
 39  
 40  
 41  
 42  
 43

## 44 References

- 45 Doubrovine, P. V., and Tarduno, J. A.: Late Cretaceous paleolatitude of the Hawaiian hot  
46 spot: New paleomagnetic data from Detroit Seamount (ODP Site 883), *Geochemistry,*  
47 *Geophysics, Geosystems*, 5, 2004.
- 48 Frank, T. D., Thomas, D. J., Leckie, R. M., Arthur, M. A., Bown, P. R., Jones, K., and Lees, J.  
49 A.: The Maastrichtian record from Shatsky Rise (northwest Pacific): A tropical  
50 perspective on global ecological and oceanographic changes, *Paleoceanography*, 20,  
51 2005.
- 52 Gradstein, F. M., and Ludden, J. N.: 43. Legs 122 and 123, northwestern Australian  
53 margin—a stratigraphic and paleogeographic summary, *Proceedings of the Ocean*  
54 *Drilling Program, Scientific Results*, 1992, 801-816,
- 55 Hague, A. M., Thomas, D. J., Huber, M., Korty, R., Woodard, S. C., and Jones, L. B.:  
56 Convection of North Pacific deep water during the early Cenozoic, *Geology*, 40, 527-530,  
57 10.1130/g32886.1, 2012.
- 58 Jiménez Berrocoso, Á., MacLeod, K. G., Martin, E. E., Bourbon, E., Londoño, C. I., and  
59 Basak, C.: Nutrient trap for Late Cretaceous organic-rich black shales in the tropical  
60 North Atlantic, *Geology*, 38, 1111-1114, 2010.
- 61 Le Houedec, S., Meynadier, L., Cogné, J. P., Allègre, C. J., and Gourlan, A. T.: Oceanwide  
62 imprint of large tectonic and oceanic events on seawater Nd isotope composition in the  
63 Indian Ocean from 90 to 40 Ma, *Geochemistry, Geophysics, Geosystems*, 13, 2012.
- 64 MacLeod, K. G., Martin, E. E., and Blair, S. W.: Nd isotopic excursion across Cretaceous  
65 ocean anoxic event 2 (Cenomanian-Turonian) in the tropical North Atlantic, *Geology*, 36,  
66 811-814, 2008.
- 67 MacLeod, K. G., Londoño, C. I., Martin, E. E., Berrocoso, Á. J., and Basak, C.: Changes in  
68 North Atlantic circulation at the end of the Cretaceous greenhouse interval, *Nature*  
69 *Geoscience*, 4, 779, 2011.
- 70 Martin, E. E., MacLeod, K. G., Berrocoso, A. J., and Bourbon, E.: Water mass circulation on  
71 Demerara Rise during the Late Cretaceous based on Nd isotopes, *Earth and Planetary*  
72 *Science Letters*, 327, 111-120, 2012.
- 73 Masson, D. G., Montadert, L., and Scrutton, R. A.: Regional Geology of the Goban Spur  
74 continental margin, *Initial Reports of the Deep Sea Drilling Project*, 80, 1115-1139, 1985.
- 75 Moiroud, M., Pucéat, E., Donnadieu, Y., Bayon, G., Guiraud, M., Voigt, S., Deconinck, J.-F.,  
76 and Monna, F.: Evolution of neodymium isotopic signature of seawater during the Late  
77 Cretaceous: Implications for intermediate and deep circulation, *Gondwana Research*, 36,  
78 503-522, 2016.
- 79 Murphy, D. P., and Thomas, D. J.: Cretaceous deep-water formation in the Indian sector  
80 of the Southern Ocean, *Paleoceanography*, 27, PA1211, 10.1029/2011pa002198, 2012.
- 81 Murphy, D. P., and Thomas, D. J.: The evolution of Late Cretaceous deep - ocean  
82 circulation in the Atlantic basins: Neodymium isotope evidence from South Atlantic drill  
83 sites for tectonic controls, *Geochemistry, Geophysics, Geosystems*, 14, 5323-5340, 2013.
- 84 Robinson, S. A., Murphy, D. P., Vance, D., and Thomas, D. J.: Formation of "Southern  
85 Component Water" in the Late Cretaceous: Evidence from Nd-isotopes, *Geology*, 38, 871-  
86 874, 10.1130/g31165.1, 2010.
- 87 Robinson, S. A., and Vance, D.: Widespread and synchronous change in deep-ocean  
88 circulation in the North and South Atlantic during the Late Cretaceous,  
89 *Paleoceanography*, 27, n/a-n/a, 10.1029/2011pa002240, 2012.
- 90 Thomas, D. J.: Evidence for deep-water production in the North Pacific Ocean during the  
91 early Cenozoic warm interval, *Nature*, 430, 65, 2004.

92 Thomas, D. J., Korty, R., Huber, M., Schubert, J. A., and Haines, B.: Nd isotopic structure of  
93 the Pacific Ocean 70–30 Ma and numerical evidence for vigorous ocean circulation and  
94 ocean heat transport in a greenhouse world, *Paleoceanography*, 29, 454-469, 2014.  
95 Voigt, S., Jung, C., Friedrich, O., Frank, M., Teschner, C., and Hoffmann, J.: Tectonically  
96 restricted deep-ocean circulation at the end of the Cretaceous greenhouse, *Earth and  
97 Planetary Science Letters*, 369, 169-177, 2013.  
98
